# Supplementary material
Source: PubMed Central journal article supplement (PMC6130768)
Supplement: NIHMS78553-supplement-Supplementary_Tables.pdf [file NIHMS78553-supplement-Supplementary_Tables.pdf]

## **SUPPLEMENTAL MATERIALS**

### **Supplementary Tables**

Supplementary Table I. Imaging sequence parameters of the study population

Supplementary Table II. Relationships of lacunes and Total Small Vessel Disease Score with baseline blood pressure, premorbid blood pressure (per SD increase) and history of hypertension

Supplementary Table III. Ordinal logistic regression analysis on the relationships of Total Small Vessel Disease Score with premorbid blood pressures measured (top vs. bottom quartile) within 1 year, 1-5 years, 5-10 years and 10-20 years of TIA/ischaemic stroke in patients aged <60

Supplementary Table IV. Ordinal logistic regression analysis on the associations between Total Small Vessel Disease Score with mean premorbid blood pressure (top vs. bottom quartile) stratified by age of which premorbid blood pressure measurement was recorded (odds ratios of premorbid blood pressure taken as top vs. bottom quartile as referent)

Supplementary Table V. Ordinal logistic regression analysis on the relationships of Total Small Vessel Disease Score with mean premorbid systolic blood pressure (top vs. bottom quartile), stratified by MRI scanner

Supplementary Table I. Imaging sequence parameters of the study population

| MR parameters                 | OxVASC scanner 1<br>Magnetom Verio, Siemens Healthcare                                                        | OxVASC scanner 2<br>Discovery MR750, GE Healthcare                        | OxVASC scanner 3<br>Achieva, Philips Healthcare                                                                         | OxVASC scanner 4<br>Signa HDxt, GE Healthcare                            |
|-------------------------------|---------------------------------------------------------------------------------------------------------------|---------------------------------------------------------------------------|-------------------------------------------------------------------------------------------------------------------------|--------------------------------------------------------------------------|
| Patients scanned              | 375                                                                                                           | 60                                                                        | 481                                                                                                                     | 93                                                                       |
| Field strength (T)            | 3                                                                                                             | 3                                                                         | 1.5                                                                                                                     | 1.5                                                                      |
| T1W TR/TE/TI (ms)             | 2000/1.94/880                                                                                                 | -                                                                         | 701/16                                                                                                                  | -                                                                        |
| T2W TR/TE (ms)                | 6000/96                                                                                                       | 5800/94                                                                   | 5061/100                                                                                                                | 3760/100                                                                 |
| FLAIR TR/TE/TI (ms) (3D)      | 9000/88/2500                                                                                                  | 9600/130/2350                                                             | 11000/140/2800                                                                                                          | 8080/112/2200                                                            |
| Diffusion TR/TE (ms)          | 5300/91                                                                                                       | 6000/84                                                                   | 2891/73                                                                                                                 | 6100/71                                                                  |
| GRE / SWI TR/TE (ms) (3D)     | GRE 504/15                                                                                                    | GRE 500/20                                                                | GRE 694/23                                                                                                              | GRE 560/25                                                               |
| Pixel bandwidth (Hz)          | 240 (T1W)<br>220 (T2W)<br>202 (FLAIR)<br>1374 (Diffusion)<br>200 (GRE)                                        | -<br>50 (T2W)<br>41.7 (FLAIR)<br>250 (Diffusion)<br>31.3 (GRE)            | 87.4 (T1W)<br>88.5 (T2W)<br>375 (FLAIR)<br>25.3 (Diffusion)<br>109.3 (GRE)                                              | -<br>47.6 (T2W)<br>31.3 (FLAIR)<br>-<br>75 (GRE)                         |
| Matrix                        | 256x256 (T1W)<br>320x320 (T2W)<br>192x192 (FLAIR)<br>130x130 (Diffusion)<br>320x256 (GRE)                     | -<br>512 (T2W)<br>384x224 (FLAIR)<br>128x128 (Diffusion)<br>288x224 (GRE) | 118x214 (T1W)<br>356x193 (T2W)<br>236x159 (FLAIR)<br>97x84 (Diffusion)<br>256x163 (GRE)                                 | 416x256 (T2W)<br>256x224 (FLAIR)<br>128x128 (Diffusion)<br>288x192 (GRE) |
| No. of slices                 | 208 (T1W)<br>25 (T2W)<br>50 (FLAIR)<br>25 (Diffusion)<br>25 (GRE)                                             | 25                                                                        | 25 (T1W)<br>25 (T2W)<br>28 (FLAIR)<br>25 (Diffusion)<br>22 (GRE)                                                        | 25                                                                       |
| Slice thickness (mm)          | 1 (T1W)<br>5 (T2W)<br>3 (FLAIR)<br>5 (Diffusion)<br>5 (GRE)                                                   | 5                                                                         | 5                                                                                                                       | 5                                                                        |
| Inter-slice gap (mm)          | 0 (T1W)<br>1 (T2W)<br>0 (FLAIR coronal)<br>1 (Diffusion)<br>1 (GRE)                                           | 1                                                                         | 1                                                                                                                       | 1                                                                        |
| Voxel size (mm <sup>3</sup> ) | 1.0x1.0x1.0 (T1W)<br>0.8x0.8x5.0 (T2W)<br>1.0x1.0x3.0 (FLAIR)<br>1.8x1.8x5.0 (Diffusion)<br>0.9x0.8x5.0 (GRE) | -                                                                         | 0.53x0.53x5.0 (T1W)<br>0.65x0.65x5.0 (T2W)<br>0.82x0.81x5.0 (FLAIR)<br>1.74x1.73x5.0 (Diffusion)<br>0.90x0.90x5.0 (GRE) | -                                                                        |

**Supplementary Table II. Relationships of lacunes and Total Small Vessel Disease Score with baseline blood pressure, premorbid blood pressure (per SD increase) and history of hypertension**

|                                                     | <b>Univariate<br/>OR (95% CI)</b> | <b>Age and sex<br/>adjusted<br/>OR (95% CI)</b> | <b>p</b> | <b>p<br/>(test of<br/>parallel<br/>lines)<sup>‡</sup></b> |
|-----------------------------------------------------|-----------------------------------|-------------------------------------------------|----------|-----------------------------------------------------------|
| <b>Lacunes*</b>                                     |                                   |                                                 |          |                                                           |
| Baseline systolic blood pressure                    | 1.17 (0.99-1.39)                  | 1.10 (0.92-1.30)                                | 0.29     | -                                                         |
| Baseline diastolic blood pressure                   | 0.84 (0.71-0.99)                  | 0.89 (0.75-1.06)                                | 0.19     | -                                                         |
| Hypertension                                        | 2.05 (1.45-2.89)                  | 1.74 (1.22-2.49)                                | 0.002    | -                                                         |
| Mean premorbid systolic blood pressure              | 1.57 (1.33-1.85)                  | 1.45 (1.21-1.73)                                | <0.001   | -                                                         |
| Mean premorbid diastolic blood pressure             | 1.28 (1.10-1.49)                  | 1.34 (1.14-1.57)                                | <0.001   | -                                                         |
|                                                     |                                   |                                                 |          |                                                           |
| <b>Total Small Vessel Disease Score<sup>†</sup></b> |                                   |                                                 |          |                                                           |
| Baseline systolic blood pressure                    | 1.34 (1.19-1.51)                  | 1.16 (1.03-1.32)                                | 0.018    | 0.18                                                      |
| Baseline diastolic blood pressure                   | 0.92 (0.82-1.03)                  | 1.10 (0.98-1.25)                                | 0.11     | <0.001                                                    |
| Hypertension                                        | 2.53 (2.01-3.20)                  | 1.61 (1.26-2.06)                                | 0.0001   | 0.47                                                      |
| Mean premorbid systolic blood pressure              | 1.95 (1.73-2.19)                  | 1.44 (1.27-1.63)                                | <0.001   | 0.054                                                     |
| Mean premorbid diastolic blood pressure             | 1.20 (1.08-1.34)                  | 1.32 (1.18-1.49)                                | <0.001   | 0.45                                                      |

OR=odds ratio; CI=confidence interval

\*binary logistic regression; <sup>†</sup>ordinal logistic regression; <sup>‡</sup>based on age and sex adjusted model

**Supplementary Table III. Ordinal logistic regression analysis on the relationships of Total Small Vessel Disease Score with premorbid blood pressures measured (top vs. bottom quartile) within 1 year, 1-5 years, 5-10 years and 10-20 years of TIA/ischaemic stroke in patients aged <60**

|                                                | Age <60 (n=251)        |        |                            |
|------------------------------------------------|------------------------|--------|----------------------------|
|                                                | Univariate OR (95% CI) | p      | p (test of parallel lines) |
| <b>Mean premorbid systolic blood pressure</b>  |                        |        |                            |
| Within 1 year                                  | 2.07 (0.78-5.47)       | 0.14   | <0.001                     |
| 1-5 years                                      | 2.32 (0.97-5.55)       | 0.060  | <0.001                     |
| 5-10 years                                     | 2.34 (0.82-6.68)       | 0.11   | <0.001                     |
| 10-20 years                                    | 3.65 (0.98-13.61)      | 0.054  | 0.97                       |
| <b>Mean premorbid diastolic blood pressure</b> |                        |        |                            |
| Within 1 year                                  | 1.03 (0.38-2.80)       | 0.95   | <0.001                     |
| 1-5 years                                      | 0.96 (0.40-2.27)       | 0.92   | <0.001                     |
| 5-10 years                                     | 2.34 (0.90-6.08)       | 0.080  | 0.24                       |
| 10-20 years                                    | 6.56 (2.47-17.41)      | 0.0002 | 0.79                       |

OR=odds ratio; CI=confidence interval

**Supplementary Table IV. Ordinal logistic regression analysis on the associations between Total Small Vessel Disease Score with mean premorbid blood pressure (top versus bottom quartile) stratified by age of which premorbid blood pressure measurement was recorded (odds ratios of premorbid blood pressure taken as top vs. bottom quartile as referent)**

|                                 | Univariate OR (95% CI) | p       | p (test of parallel lines) |
|---------------------------------|------------------------|---------|----------------------------|
| <b>Systolic blood pressure</b>  |                        |         |                            |
| ≤55 years                       | 3.02 (1.46-6.27)       | 0.003   | 0.25                       |
| 56-65 years                     | 2.66 (1.68-4.19)       | <0.0001 | 0.93                       |
| 66-75 years                     | 2.69 (1.71-4.22)       | <0.0001 | 0.69                       |
| >75 years                       | 2.34 (1.29-4.26)       | 0.005   | 0.58                       |
| <b>Diastolic blood pressure</b> |                        |         |                            |
| ≤55 years                       | 3.14 (1.80-5.50)       | <0.0001 | 0.41                       |
| 56-65 years                     | 2.31 (1.47-3.63)       | 0.0003  | 0.96                       |
| 66-75 years                     | 2.23 (1.43-3.50)       | 0.0004  | 0.05                       |
| >75 years                       | 1.26 (0.70-2.27)       | 0.44    | 0.83                       |

OR=odds ratio; CI=confidence interval

**Supplementary Table V. Ordinal regression analysis on the relationships of Total Small Vessel Disease Score with mean premorbid systolic blood pressure (top vs. bottom quartile), stratified by MRI scanner**

|               | Univariate OR (95% CI) | p       |
|---------------|------------------------|---------|
| MRI scanner 1 | 4.70 (2.70-8.17)       | <0.0001 |
| MRI scanner 2 | 11.58 (2.83-47.23)     | 0.001   |
| MRI scanner 3 | 9.16 (5.38-15.58)      | <0.0001 |
| MRI scanner 4 | 2.76 (0.94-8.05)       | 0.064   |

OR=odds ratio; CI=confidence interval
